# Supplementary material for: Ion-imprinted modified molecular sieves show the efficient selective adsorption of chromium(vi) from aqueous solutions
Source: Royal Society of Chemistry journal article supplement (doi:10.1039/d0ra08501d), 2020-01-01
Supplement: d0ra08501d1.pdf [file d0ra08501d1.pdf]

## Supporting information of

### Ion-imprinted modified molecular sieves show efficient selective adsorption of chromium (VI) from aqueous solutions

Junwen Li,<sup>a</sup> and Haiming Cheng<sup>\*a,b</sup>

*a. The Key Laboratory of Leather Chemistry and Engineering of Ministry of Education,*

*Sichuan University, Chengdu 610065, China*

*b. National Engineering Laboratory for Clean Technology of Leather Manufacture,*

*Sichuan University, Chengdu 610065, Sichuan, China*

**Table S1** Typical adsorption isotherms, kinetics models equations investigated in the present work<sup>[1-3]</sup>.

| Model                     | Equation                              |
|---------------------------|---------------------------------------|
| Langmuir isotherm         | $C_e / q_e = 1 / K_L q_m + C_e / q_m$ |
| Freundlich isotherm       | $\ln q_e = \ln K_F + \ln C_e / n$     |
| Pseudo-first-order model  | $\ln(q_e - q_t) = \ln q_e - k_1 t$    |
| Pseudo-second-order model | $t / q_t = 1 / (k_2 q_e^2) + t / q_e$ |

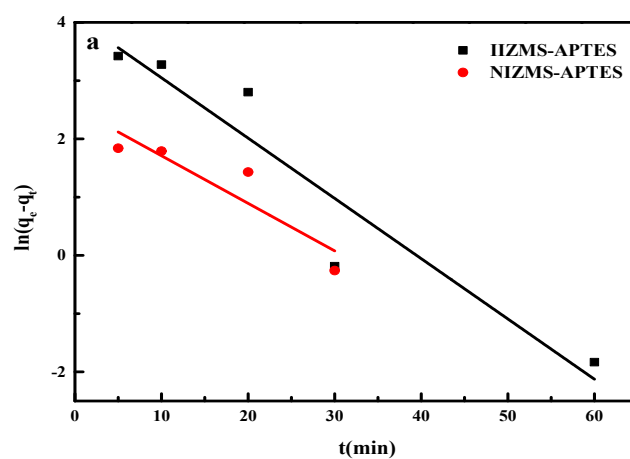

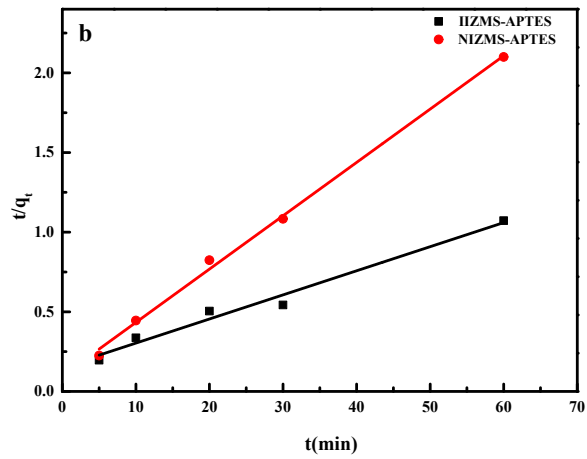

**Figure S1.**(a) pseudo-first-order, (b) pseudo-second-order and model kinetic plots of adsorption chromium(VI) onto IIZMS-APTES and NIZMS-APTES. Conditions: pH = 2.0, T = 30°C, C<sub>0</sub> = 100 mg/L.

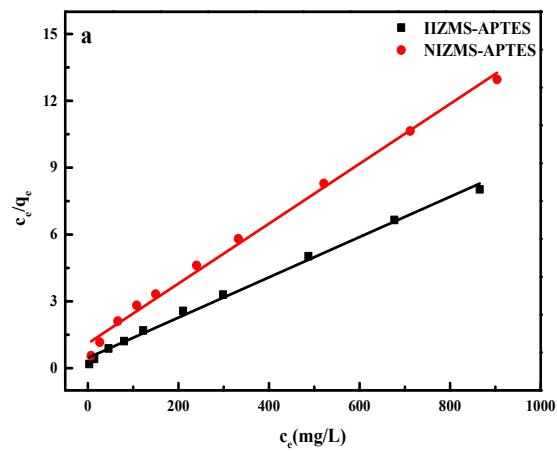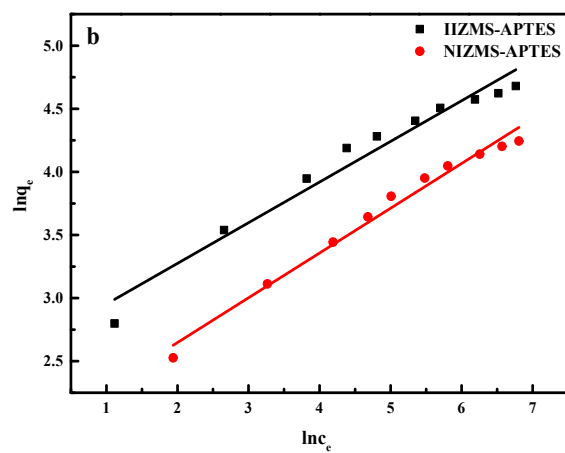

---

**Figure S2.** Absorption isotherms: (a) Langmuir model; (b) Freundlich model. Conditions: pH = 2.0, T = 30 °C, t = 60 min.

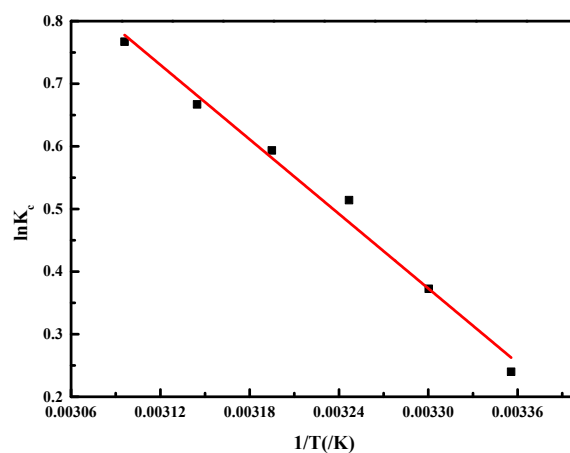

**Figure S3.** The plot of  $\ln K_d$  versus  $1/T$ . Conditions: Cr(VI) concentration = 100 mg/L, pH 2.0, t = 60 min.

## References

1. Langmuir, I. The adsorption of gases on plane surfaces of glass, mica and platinum. *J. Am. Chem. Soc.* **1918**, *40*, 1361-1403.
2. Freundlich, H. Over the adsorption in solution. *J. Phys. Chem.* **1906**, *57*, 1100-1107.
3. Lagergren, S. Zur theorie der sogenannten adsorption gelosterstoffe, Kungliga Svenska Vetenskapsakademiens. *Handlingar.* **1898**, *24*, 1-39.
